# Supplementary material for: Retrogressive thaw slumps along the Qinghai–Tibet Engineering Corridor: a comprehensive inventory and their distribution characteristics
Source: Copernicus journal article supplement (doi:10.5194/essd-14-3875-2022), 2022-08-31
Supplement: Supplementary file 1 [file essd-14-3875-2022-supplement.pdf]

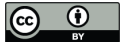

*Supplement of*

## **Retrogressive thaw slumps along the Qinghai–Tibet Engineering Corridor: a comprehensive inventory and their distribution characteristics**

**Zhuoxuan Xia et al.**

*Correspondence to:* Lingcao Huang ([huanglingcao@link.cuhk.edu.hk](mailto:huanglingcao@link.cuhk.edu.hk))

The copyright of individual parts of the supplement might differ from the article licence.

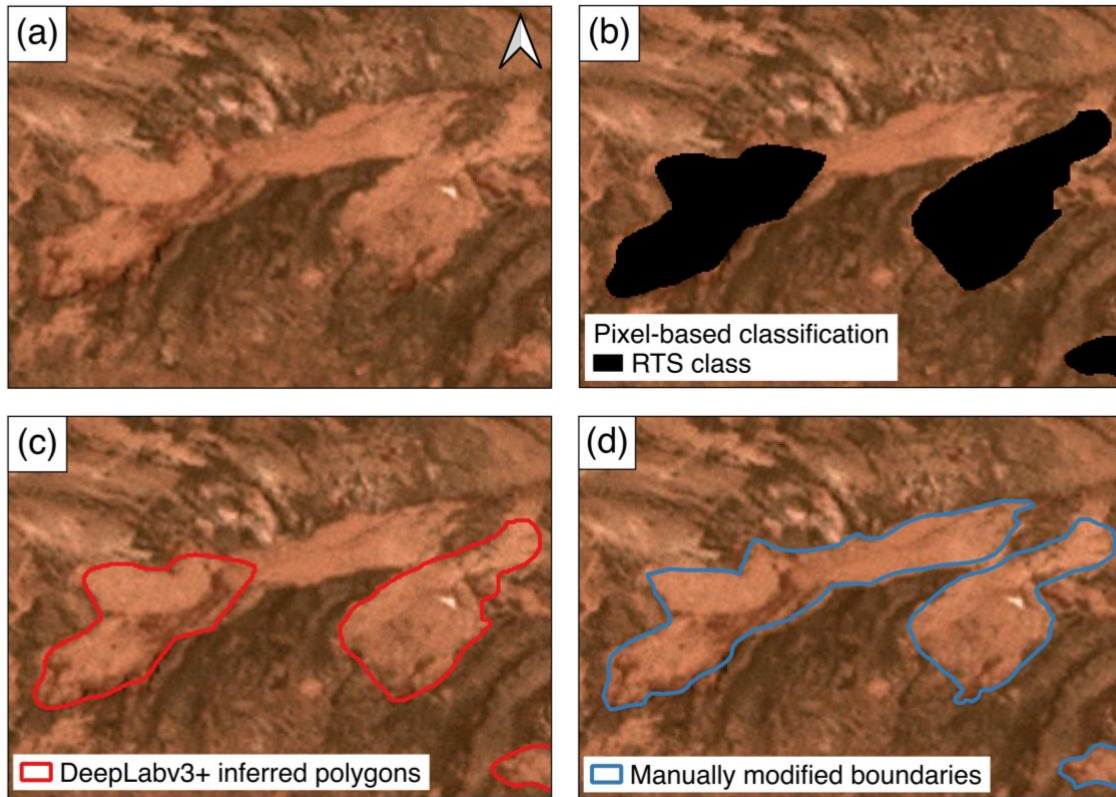

**Figure S1. Examples of DeepLabv3+ outputs and manually modified RTS boundaries. (a) Planet images. (b) Pixel-based classification results. (c) DeepLabv3+ predicted RTS polygons. (d) Manually modified RTS boundaries. The location is 92.76° E, 35.09° N. Basemap images © Planet Labs Inc.**
